# Supplementary material for: Amoeba Predation of Cryptococcus neoformans Results in Pleiotropic Changes to Traits Associated with Virulence
Source: PubMed Central journal article supplement (PMC8092252; doi:10.1128/mbio.00567-21), 2021-04-27

## Supplementary Figure 2

| Isolates | Amoebae resistance | Capsule           | Urease            | Melanin           | Cell size         | Growth at 40°C    | Fluconazole resistance | MØ resistance | Galleria virulence |
|----------|--------------------|-------------------|-------------------|-------------------|-------------------|-------------------|------------------------|---------------|--------------------|
| H1       | Slightly increase  | No change         | Slightly increase | Slightly decrease | No change         | No change         | Slightly increase      | No change     | No change          |
| H2       | Slightly increase  | No change         | Slightly increase | Slightly decrease | No change         | No change         | Slightly increase      | No change     | No change          |
| H14      | Slightly increase  | No change         | Slightly increase | Slightly decrease | No change         | No change         | Slightly increase      | No change     | No change          |
| H13      | Largely increase   | Largely increase  | Slightly increase | No change         | No change         | Slightly decrease | Slightly decrease      | No change     | Slightly decrease  |
| H16      | Largely increase   | Largely increase  | Slightly increase | No change         | No change         | Slightly decrease | Slightly decrease      | No change     | Slightly decrease  |
| H17      | Largely increase   | Largely increase  | Slightly increase | No change         | No change         | Slightly decrease | Slightly decrease      | No change     | Slightly decrease  |
| A1       | No change          | Largely increase  | Largely increase  | Slightly decrease | No change         | Slightly decrease | No change              | No change     | No change          |
| A2       | No change          | Largely increase  | Largely increase  | Slightly decrease | No change         | Slightly decrease | No change              | No change     | No change          |
| A3       | No change          | Largely increase  | Largely increase  | Slightly decrease | No change         | Slightly decrease | No change              | No change     | No change          |
| A4       | Largely increase   | Largely increase  | Largely increase  | Slightly decrease | No change         | Largely decrease  | Slightly decrease      | No change     | Slightly decrease  |
| A5       | Largely increase   | Largely increase  | Largely increase  | Slightly decrease | No change         | Largely decrease  | Slightly decrease      | No change     | Slightly decrease  |
| A6       | Largely increase   | Largely increase  | Largely increase  | Slightly decrease | No change         | Largely decrease  | Slightly decrease      | No change     | Slightly decrease  |
| F1       | Slightly decrease  | Slightly increase | Largely increase  | Slightly decrease | No change         | No change         | No change              | No change     | No change          |
| F2       | No change          | No change         | Largely increase  | Slightly decrease | No change         | No change         | No change              | No change     | No change          |
| F3       | Slightly increase  | Largely increase  | Largely increase  | Largely decrease  | Slightly increase | Slightly decrease | Largely decrease       | No change     | No change          |
| F4       | Slightly increase  | Largely increase  | Largely increase  | Largely decrease  | Slightly increase | Slightly decrease | Largely decrease       | No change     | No change          |
| F5       | Slightly increase  | Largely increase  | Largely increase  | Largely decrease  | Slightly increase | Slightly decrease | Largely decrease       | No change     | No change          |
| F6       | Slightly increase  | Largely increase  | Largely increase  | Largely decrease  | Slightly increase | Slightly decrease | Largely decrease       | No change     | No change          |

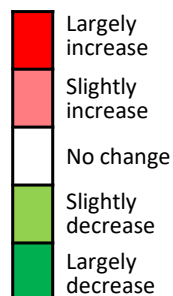

Supplement: mBio.00567-21-sf002.pdf [file mBio.00567-21-sf002.pdf]
