# Supplementary material for: Amoeba Predation of Cryptococcus neoformans Results in Pleiotropic Changes to Traits Associated with Virulence
Source: PubMed Central journal article supplement (PMC8092252; doi:10.1128/mbio.00567-21), 2021-04-27

# Supplementary Figure 4

60 dpi

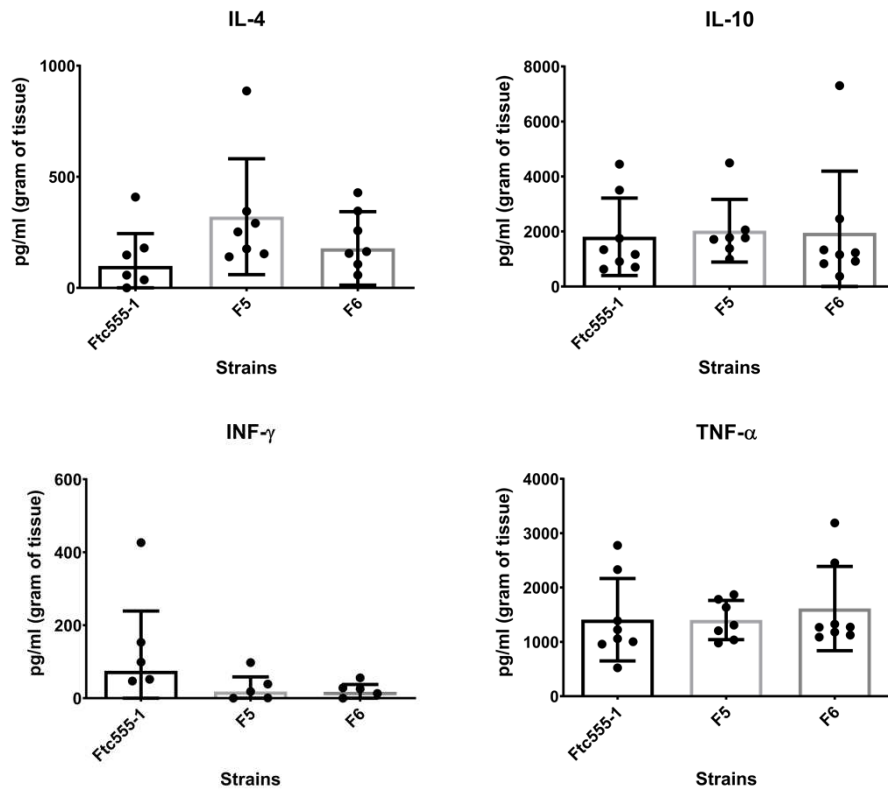

5 dpi

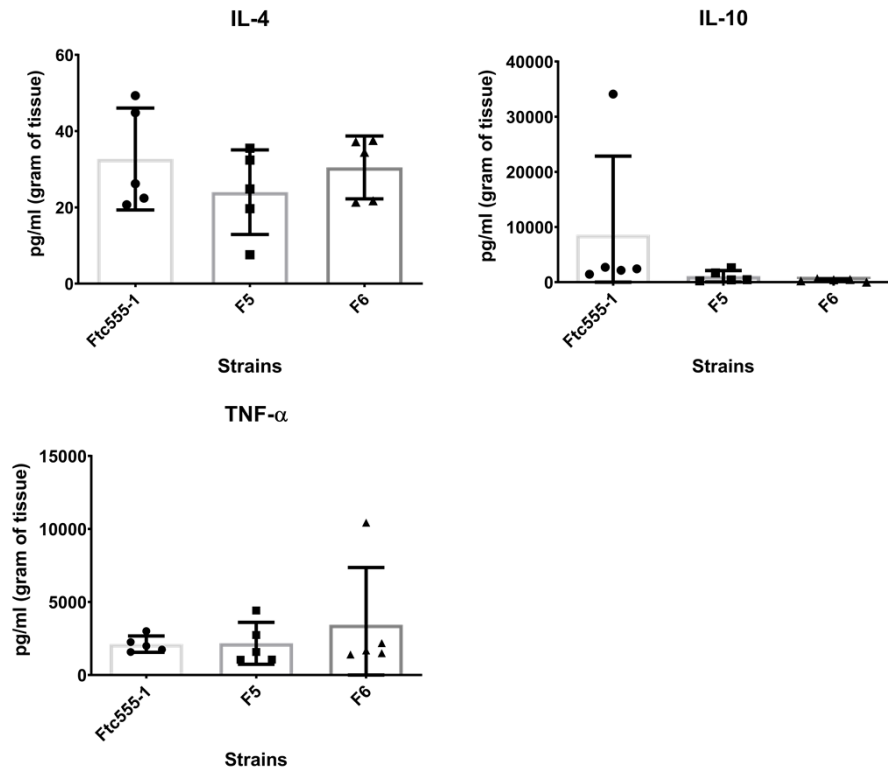

Supplement: mBio.00567-21-sf004.pdf [file mBio.00567-21-sf004.pdf]
