# Supplementary material for: Amoeba Predation of Cryptococcus neoformans Results in Pleiotropic Changes to Traits Associated with Virulence
Source: PubMed Central journal article supplement (PMC8092252; doi:10.1128/mbio.00567-21), 2021-04-27

# Supplementary Figure 5

**A**

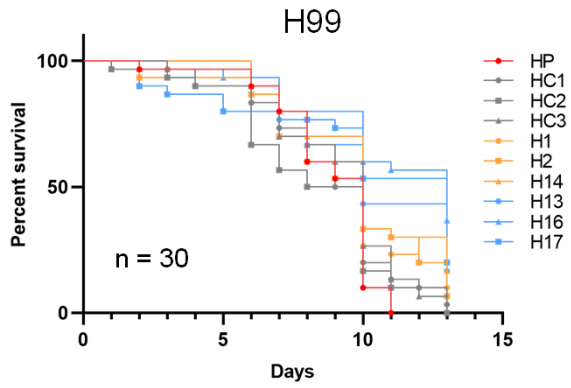

**B**

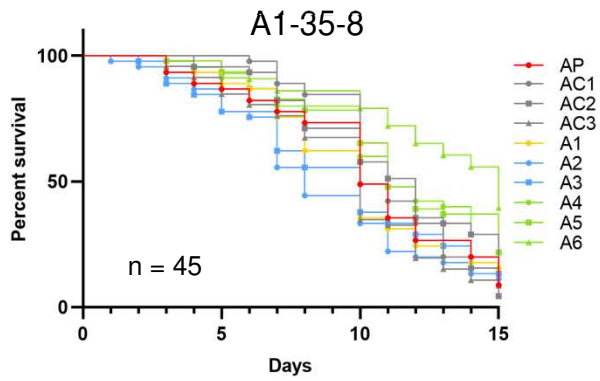

**C**

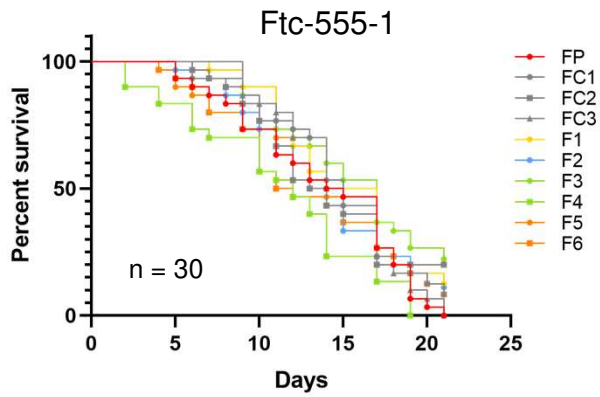

Supplement: mBio.00567-21-sf005.pdf [file mBio.00567-21-sf005.pdf]
